# Supplementary material
Source: HighWire-hosted journal article supplement (https://diabetes.diabetesjournals.org/content/suppl/2006/08/29/55.9.2571)
Supplement: PG2571onlineappendixlegend.pdf [file PG2571onlineappendixlegend.pdf]

**Supplemental Figure 1.** Serially subcultured hTERT cells are euploid. Representative metaphase chromosome spreads of telomerase-expressing clones S1.17 (**A**) and S1.22 (**B**) that had undergone 40 and 65 population doublings, respectively, are shown. Chromosome complement and morphology were normal in 11 analyses of each strain.
