# Supplementary material
Source: HighWire-hosted journal article supplement (https://diabetes.diabetesjournals.org/content/suppl/2006/08/29/55.9.2571)

# Supplemental Fig. 1

**A**

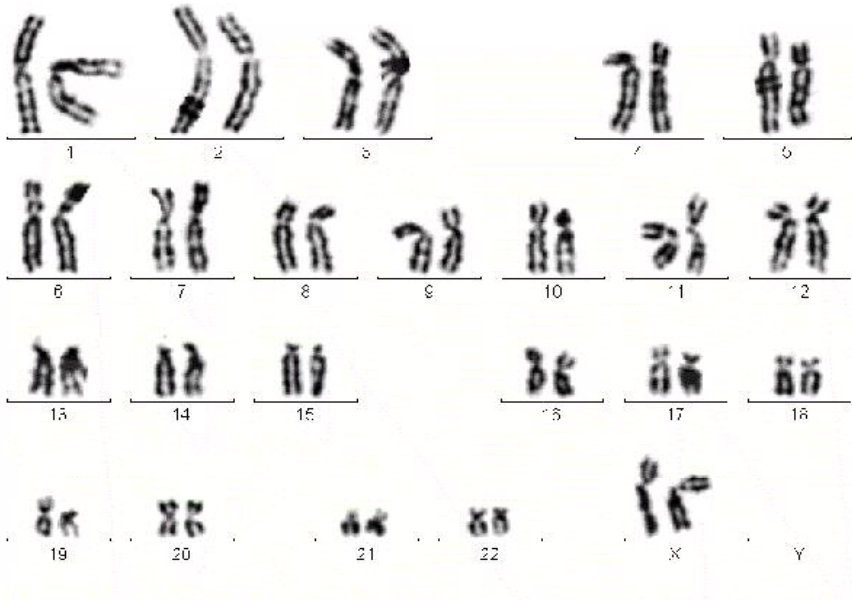

**B**

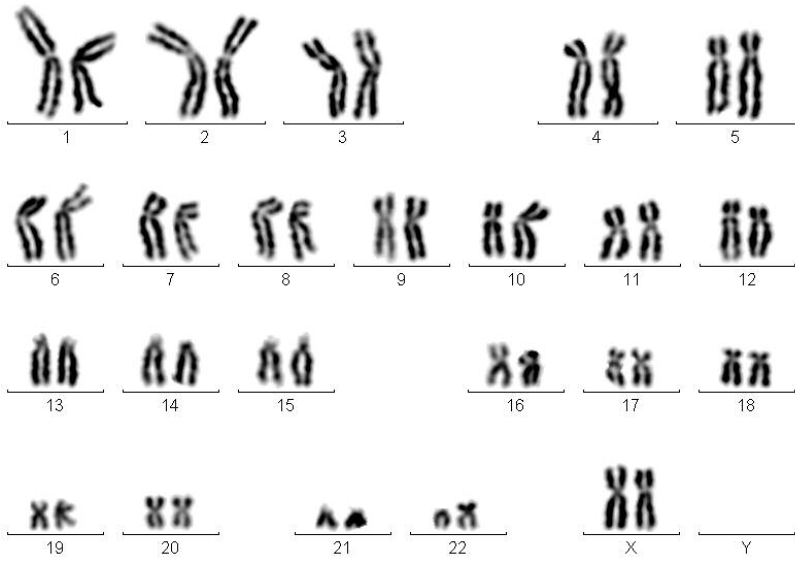

Supplement: PG2571onlineappendixfig.pdf [file PG2571onlineappendixfig.pdf]
